# Supplementary material
Source: PubMed Central journal article supplement (PMC2679933)
Supplement: rsbl20090089s01.pdf [file rsbl20090089s01.pdf]

## **New frontiers in biologging science**

**Christian Rutz\* and Graeme C. Hays**

*\* Author for correspondence ([christian.rutz@zoo.ox.ac.uk](mailto:christian.rutz@zoo.ox.ac.uk))*

---

**SUPPLEMENTARY REFERENCES**

The following bibliography is intended to help interested readers access the vast literature on biologging technology and its field application.

- Block, B.A. 2005 Physiological ecology in the 21st century: advancements in biologging science. *Integr. Comp. Biol.* **45**, 305–320.
- Boyd, I.L., Kato, A. & Ropert-Coudert, Y. 2004 Bio-logging science: sensing beyond the boundaries. *Mem. Natl. Inst. Polar Res. (Special Issue)* **58**, 1–14.
- Butler, P.J. 1989 Telemetric recording of physiological data from freeliving animals. In *Towards a more exact ecology* (eds P.J. Grubb & J.B. Whittaker), pp. 63–84. London, UK: Blackwell.
- Cooke, S.J. 2008 Biotelemetry and biologging in endangered species research and animal conservation: relevance to regional, national, and IUCN Red List threat assessments. *Endang. Species Res.* **4**, 165–185.
- Cooke, S.J., Hinch, S.G., Wikelski, M., Andrews, R.D., Kuchel, L.J., Wolcott, T.G. & Butler, P.J. 2004 Biotelemetry: a mechanistic approach to ecology. *Trends Ecol. Evol.* **19**, 334–343.
- Costa, D.P. & Sinervo, B. 2004 Field physiology: physiological insights from animals in nature. *Ann. Rev. Physiol.* **66**, 209–238.
- Davis, R.W. 2008 Bio-logging as a method for understanding natural systems. *ICKS 2008, art. no. 4460461*, 12–17.
- Godley, B.J. & Wilson, R.P. 2008 Tracking vertebrates for conservation: Introduction. *Endang. Species Res.* **4**, 1–2.
- Hooker, S.K., Biuw, M., McConnell, B.J., Miller, P.J.O. & Sparling, C.E. 2007 Bio-logging science: Logging and relaying physical and biological data using animal-attached tags. *Deep-Sea Res. II* **54**, 177–182.
- Kays, R.W. & Wikelski, M. 2007 Review of the NSF sponsored animal tracking and physiological monitoring workshop. Report published online at [www.movebank.org](http://www.movebank.org)
- Kenward, R.E. 2001 *A manual for wildlife radio tagging*. London, UK: Academic Press.
- Kooyman, G.L. 2004 Genesis and evolution of bio-logging devices: 1963–2002. *Mem. Natl. Inst. Polar Res. (Special Issue)* **58**, 15–22.
- Marshall, G. (ed.) 2008 *Proceedings of the 2007 Animal-Borne Imaging Symposium; 2007 Oct 10–13*. Washington DC, USA: National Geographic Society.
- Millspaugh, J.J. & Marzluff, J.M. (eds) 2001 *Radio tracking and animal populations*. London, UK: Academic Press.
- Moll, R.J., Millspaugh, J.J., Beringer, J., Sartwell, J. & He, Z. 2007 A new ‘view’ of ecology and conservation through animal-borne video systems. *Trends Ecol. Evol.* **22**, 660–668.
- Naito, Y. 2004 New steps in bio-logging science. *Mem. Natl. Inst. Polar Res. (Special Issue)* **58**, 50–57.
- Ropert-Coudert, Y. & Wilson, R.P. 2005 Trends and perspectives in animal-attached remote sensing. *Front. Ecol. Environ.* **3**, 437–444.
- Rutz, C. & Bluff, L.A. 2008 Animal-borne imaging takes wing, or the dawn of ‘wildlife video-tracking’. *Trends Ecol. Evol.* **23**, 292–294.
- Wikelski, M. & Cooke, S.J. 2006 Conservation physiology. *Trends Ecol. Evol.* **21**, 38–46.
- Wilson, R.P. & McMahon, C.R. 2006 Measuring devices on wild animals: what constitutes acceptable practice? *Front. Ecol. Environ.* **4**, 147–154.

## SUPPLEMENTARY TABLES

Table S1. Summary statistics for the third international conference on biologging science (Biologging III), and two earlier meetings. Three (non-independent) measures indicate that collaborative projects in this field have been increasing in size. The focus of the meetings remained on marine applications (*cf.* §1 and §3). Note that all information was extracted from the conferences' abstract booklets, i.e., late changes could not be considered (e.g., for Biologging III, 100 talks are included in the booklet, but only 96 were delivered).

|                                                                | Biologging I       | Biologging II      | Biologging III <sup>a</sup> |
|----------------------------------------------------------------|--------------------|--------------------|-----------------------------|
| year                                                           | 2003               | 2005               | 2008                        |
| location                                                       | Tokyo,<br>Japan    | St. Andrews,<br>UK | Pacific Grove,<br>USA       |
| sessions (talks only)                                          | 7                  | 6                  | 8 <sup>b</sup>              |
| abstracts (talks/posters)                                      | 100 (52/48)        | 93 (53/40)         | 143 (100/43)                |
| authors per abstract (median, mean $\pm$ SE) <sup>c</sup>      | 3.0, 3.4 $\pm$ 0.2 | 4.0, 4.2 $\pm$ 0.3 | 5.0, 5.1 $\pm$ 0.3          |
| affiliations per abstract (median, mean $\pm$ SE) <sup>d</sup> | 2.0, 2.1 $\pm$ 0.1 | 2.0, 2.5 $\pm$ 0.2 | 3.0, 2.8 $\pm$ 0.1          |
| authors per affiliation (median, mean $\pm$ SE) <sup>e</sup>   | 1.5, 1.7 $\pm$ 0.1 | 1.5, 1.9 $\pm$ 0.1 | 2.0, 2.0 $\pm$ 0.1          |
| abstracts mentioning study system                              | 92                 | 89                 | 137                         |
| of which aquatic <sup>f</sup>                                  | 75%                | 85%                | 85%                         |
| of which flying sea birds                                      | 20%                | 13% <sup>h</sup>   | 9% <sup>h</sup>             |
| of which terrestrial <sup>g</sup>                              | 5%                 | 1%                 | 6%                          |

<sup>a</sup> The conference was attended by 209 delegates from 20 different nations (D. Kohrs, pers. comm.).

<sup>b</sup> Session topics: (1) biologging and climate change; (2) monitoring organismal physiology; (3) linking ecology and oceanography; (4) new frontiers in biologging data analysis and visualization; (5) new frontiers in electronic tag technology; (6) conservation and management applications of biologging science; (7) at sea observation and laboratory modelling of animal behaviour; (8) marine life and ocean observatory networks.

<sup>c</sup> Kruskal-Wallis test,  $H_2 = 23.16$ ,  $p < 0.0001$ ; *post-hoc* Mann-Whitney *U*-tests are significant, at a Bonferroni-corrected  $\alpha = 0.017$ , for I vs. III and II vs. III.

<sup>d</sup> This count includes multiple, and new, affiliations of authors. Kruskal-Wallis test,  $H_2 = 13.17$ ,  $p = 0.001$ ; a *post-hoc* Mann-Whitney *U*-test is significant, at a Bonferroni-corrected  $\alpha = 0.017$ , for I vs. III.

<sup>e</sup> This statistic is based on dividing, for each abstract, the number of authors by the number of affiliations. Kruskal-Wallis test,  $H_2 = 7.72$ ,  $p = 0.021$ ; a *post-hoc* Mann-Whitney *U*-test is significant, at a Bonferroni-corrected  $\alpha = 0.017$ , for I vs. III.

<sup>f</sup> Abstracts are only considered if they make unambiguous reference to aquatic study systems (species mentioned; empirical data mentioned; broader discussion/review); this category combines marine and freshwater systems and includes penguins.

<sup>g</sup> Abstracts are only considered if they make unambiguous reference to terrestrial study systems; this category includes one abstract on polar bears.

<sup>h</sup> If abstracts are added here that mention both aquatic and sea-bird systems, the values increase to 16% (II) and 11% (III), respectively.

Table S2. Full results of a keyword search conducted with the abstract booklets of the first three biologging conferences (2003, Toyko, Japan,  $n = 100$  abstracts; 2005, St. Andrews, UK,  $n = 93$  abstracts; 2008, Pacific Grove, USA,  $n = 143$  abstracts). For further details on methodology, see caption and footnotes of table 1. Each table cell contains three values: (i) percentage of titles that contained a particular keyword at least once; (ii) percentage of abstracts that contained a particular keyword at least once; and (iii) number of times a keyword was mentioned in abstracts that contained that keyword.

| categories and keywords                         | conference |      |     |      |      |     |      |      |     |
|-------------------------------------------------|------------|------|-----|------|------|-----|------|------|-----|
|                                                 | 2003       |      |     | 2005 |      |     | 2008 |      |     |
|                                                 | i          | ii   | iii | i    | ii   | iii | i    | ii   | iii |
| <b>(a) tagging technology</b>                   |            |      |     |      |      |     |      |      |     |
| <i>satellite</i> (tracking, not remote sensing) | 10.0       | 25.0 | 1.6 | 7.5  | 29.0 | 1.4 | 2.8  | 22.4 | 1.6 |
| <i>Argos</i>                                    | 1.0        | 8.0  | 1.4 | 3.2  | 14.0 | 1.2 | 4.9  | 10.5 | 2.8 |
| <i>GPS</i>                                      | 4.0        | 6.0  | 2.3 | 2.2  | 9.7  | 2.0 | 7.7  | 14.7 | 2.8 |
| <i>Fastloc</i>                                  | n/a        | n/a  | n/a | n/a  | n/a  | n/a | 1.4  | 6.3  | 1.6 |
| <i>acceler*</i> (as in accelerometer)           | 4.0        | 14.0 | 1.9 | 3.2  | 16.1 | 1.6 | 8.4  | 20.3 | 2.7 |
| <i>video</i> (animal-borne imaging)             | 2.0        | 5.0  | 2.4 | 1.1  | 3.2  | 2.0 | 1.4  | 2.1  | 4.3 |
| <i>camera</i> (animal-borne imaging)            | 1.0        | 7.0  | 1.4 | 0.0  | 3.2  | 1.7 | 2.1  | 2.8  | 2.0 |
| <i>imag*</i> (animal-borne imaging)             | 1.0        | 2.0  | 5.0 | 2.2  | 2.2  | 3.5 | 0.0  | 1.4  | 2.5 |
| <i>CTD</i>                                      | 0.0        | 2.0  | 1.5 | 1.1  | 2.2  | 2.5 | 2.8  | 6.3  | 1.9 |
| <i>SRDL</i>                                     | 0.0        | 2.0  | 1.5 | 0.0  | 2.2  | 1.0 | 0.7  | 3.5  | 2.4 |
| <b>(b) analysis and research approach</b>       |            |      |     |      |      |     |      |      |     |
| <i>state*</i> (as in state-space model)         | 0.0        | 0.0  | n/a | 0.0  | 2.2  | 1.0 | 0.7  | 5.6  | 1.1 |
| <i>ODBA</i>                                     | n/a        | n/a  | n/a | n/a  | n/a  | n/a | 0.0  | 2.1  | 4.3 |
| <i>hypoth*</i> (as in hypothesis)               | 0.0        | 4.0  | 1.5 | 0.0  | 9.7  | 1.1 | 0.0  | 10.5 | 1.3 |
| <i>model*</i> (as in theoretical model)         | 2.0        | 16.0 | 1.8 | 1.1  | 17.2 | 1.6 | 4.2  | 23.1 | 2.2 |
| <i>experim*</i> (as in experiment)              | 0.0        | 10.0 | 1.5 | 0.0  | 9.7  | 1.0 | 1.4  | 9.1  | 1.5 |
| <i>calibr*</i> (as in calibration)              | 0.0        | 1.0  | 1.0 | 0.0  | 2.2  | 1.0 | 0.0  | 4.9  | 1.6 |
| <i>automat*</i> (as in automated analysis)      | 0.0        | 3.0  | 1.3 | 0.0  | 4.3  | 1.0 | 0.7  | 2.8  | 1.8 |
| <b>(c) research topics</b>                      |            |      |     |      |      |     |      |      |     |
| <i>physiol*</i> (as in physiology)              | 2.0        | 17.0 | 1.4 | 4.3  | 12.9 | 1.3 | 2.8  | 10.5 | 1.3 |
| <i>behav*</i> (as in behaviour)                 | 23.0       | 52.0 | 2.1 | 20.4 | 64.5 | 2.2 | 14.7 | 66.4 | 2.2 |
| <i>forag*</i> (as in foraging)                  | 18.0       | 41.0 | 2.9 | 17.2 | 47.3 | 3.8 | 12.6 | 48.3 | 3.2 |
| <i>habitat</i>                                  | 4.0        | 13.0 | 2.2 | 1.1  | 11.8 | 1.5 | 9.8  | 33.6 | 2.3 |
| <i>conserv*</i> (as in conservation biology)    | 0.0        | 4.0  | 1.3 | 1.1  | 4.3  | 1.5 | 2.1  | 9.1  | 1.2 |
| <i>climat*</i> (as in climate change)           | 0.0        | 0.0  | n/a | 0.0  | 1.1  | 2.0 | 0.0  | 7.0  | 1.2 |
| <i>climat*</i> (as in macro climate)            | 0.0        | 2.0  | 1.0 | 1.1  | 2.2  | 2.5 | 0.0  | 11.2 | 1.4 |
| <i>predat*</i> (as in predation)                | 2.0        | 12.0 | 1.4 | 0.0  | 16.1 | 1.6 | 5.6  | 18.9 | 2.1 |
| <i>ecol*</i> (as in ecology)                    | 5.0        | 16.0 | 1.2 | 3.2  | 9.7  | 1.2 | 4.2  | 24.5 | 1.3 |
| <i>welfare</i>                                  | 1.0        | 1.0  | 4.0 | 0.0  | 0.0  | n/a | 0.0  | 0.0  | n/a |
| <i>ethic*</i> (as in ethical issues)            | 0.0        | 1.0  | 1.0 | 0.0  | 1.1  | 1.0 | 0.0  | 0.0  | n/a |

Table S3. A selection of large-scale collaborative biologging projects (listed in alphabetical order).

| project acronym | project name                                               | abstract (page) | website (www)                    |
|-----------------|------------------------------------------------------------|-----------------|----------------------------------|
| AATAMS          | Australian Acoustic Tracking and Monitoring System         | 35              | n/a                              |
| ACT             | Atlantic Cooperative Telemetry                             | 24              | n/a                              |
| ARTS            | Automated Radio Telemetry System                           | n/a             | princeton.edu/~wikelski/research |
| CFTC            | California Fish Tracking Consortium                        | n/a             | n/a                              |
|                 | Codysey                                                    | 6               | codysey.co.uk                    |
| EELIAD          | European Eels in the Atlantic: Assessment of Their Decline | 6               | eeliad.com                       |
| FACT            | Florida Atlantic Coast Telemetry Project                   | n/a             | n/a                              |
| ICARUS          | International Cooperation for Animal Research Using Space  | n/a             | IcarusInitiative.org             |
|                 | Movebank                                                   | n/a             | movebank.org                     |
| OTN             | Ocean Tracking Network                                     | 24, 37, 57      | oceantrackingnetwork.org         |
| POST            | Pacific Ocean Shelf Tracking Project                       | 37, 57          | postcoml.org                     |
| TAG             | Tag-A-Giant Foundation                                     | 1               | tagagiant.org                    |
| TOPP            | Tagging of Pacific Pelagics                                | e.g., 1, 16     | topp.org                         |
